# Supplementary material
Source: MDPI journal article supplement (https://www.mdpi.com/1424-8247/15/6/699)
Supplement: s1 [file s1]

Article

# In Vitro Evaluation of the Antioxidant Activity and Chemopreventive Potential in Human Breast Cancer Cell Lines of the Standardized Extract Obtained from the Aerial Parts of Zigzag Clover (*Trifolium medium* L.)

Grażyna Zgórk<sup>1,\*</sup>, Magdalena Maciejewska-Turska<sup>1</sup>, Anna Makuch-Kocka<sup>2</sup>, Tomasz Plech<sup>2</sup>

<sup>1</sup> Department of Pharmacognosy with the Medicinal Plant Garden, Faculty of Pharmacy, Medical University of Lublin, 1 Chodźki Str., 20-093 Lublin, Poland; grazyna.zgorka@umlub.pl (G.Z.); magdalena.maciejewska@umlub.pl (M.M.T.)

<sup>2</sup> Department of Pharmacology, Chair of Pharmacology and Biology, Faculty of Health Sciences, Medical University of Lublin, 20-093 Lublin, Poland; anna.makuch@umlub.pl (A.M.K.); tomasz.plech@umlub.pl (T.P.)

\* Correspondence: grazyna.zgorka@umlub.pl.

## Supplementary Materials

**Citation:** Zgórk, G.; Maciejewska-Turska, M.; Makuch-Kocka, A.; Plech, T. In Vitro Evaluation of the Antioxidant Activity and Chemopreventive Potential in Human Breast Cancer Cell Lines of the Standardized Extract Obtained from the Aerial Parts of Zigzag Clover (*Trifolium medium* L.). *Pharmaceuticals* **2022**, *15*, 699. <https://doi.org/10.3390/ph15060699>

Academic Editor: Jong Heon Kim

Received: 15 May 2022

Accepted: 31 May 2022

Published: 2 June 2022

**Publisher's Note:** MDPI stays neutral with regard to jurisdictional claims in published maps and institutional affiliations.

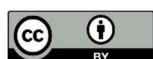

**Copyright:** © 2022 by the authors. Submitted for possible open access publication under the terms and conditions of the Creative Commons Attribution (CC BY) license (<https://creativecommons.org/licenses/by/4.0/>).

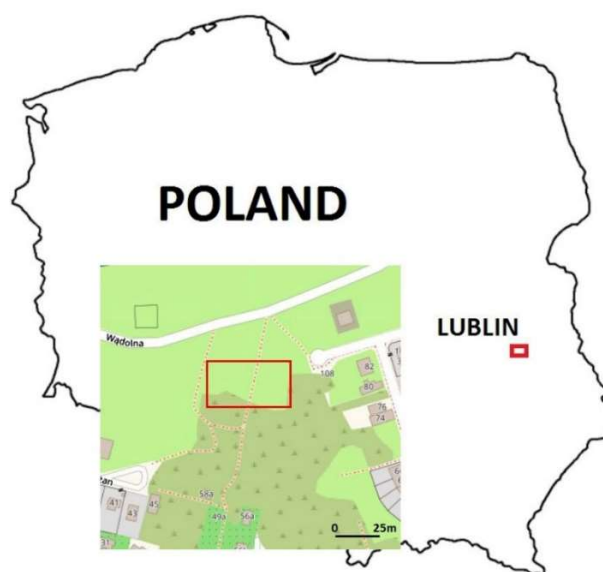

**Figure S1.** A collection site of wild zigzag clover (in red frame) against the contour map of Poland and a fragment of enlarged map of the city of Lublin

**Table S1.** Mean retention times ( $t_R$ ), linearity parameters for calibration curves ( $y = ax + b$ ), and  $LOD$  and  $LOQ$  values ( $\lambda = 260$  nm) obtained for reference isoflavones using RP-LC/PDA method

| Isoflavone   | $t_R$ (min) | $a$      | $b$    | $R^2$   | $LOD$ (ng/ml) | $LOQ$ (ng/ml) |
|--------------|-------------|----------|--------|---------|---------------|---------------|
| genistin     | 36.31       | 49167.58 | -7.38  | 0.99994 | 86            | 287           |
| ononin       | 43.57       | 36949.68 | 1.67   | 0.99996 | 123           | 410           |
| sissostrin   | 54.64       | 51416.04 | -3.05  | 0.99998 | 97            | 323           |
| genistein    | 64.01       | 76505.19 | 2.38   | 0.99998 | 71            | 237           |
| formononetin | 68.19       | 53013.74 | -4.72  | 0.99997 | 47            | 157           |
| biochanin A  | 72.15       | 72150.31 | -12.47 | 0.99997 | 28            | 93            |

Abbreviations:  $a$ - slope;  $b$ - intercept;  $R^2$ - regression coefficient;  $LOD$ - limit of detection;  $LOQ$ - limit of quantification

**Table S2.** Mean results ( $\mu\text{g/g}$  dry wt) obtained for TML isoflavones in intra- and inter-day precision assays using the RP-LC/PDA method

| Inter-day ( $n = 9$ ) | Intra-day ( $n = 3$ ) |           |                     |           |                     |           |       |           |
|-----------------------|-----------------------|-----------|---------------------|-----------|---------------------|-----------|-------|-----------|
|                       | 1 <sup>st</sup> day   |           | 2 <sup>nd</sup> day |           | 3 <sup>rd</sup> day |           |       |           |
|                       | Mean                  | $RSD$ (%) | Mean                | $RSD$ (%) | Mean                | $RSD$ (%) | Mean  | $RSD$ (%) |
| genistein             | 2001                  | 1.2       | 2048                | 0.9       | 2037                | 1.4       | 2029  | 1.2       |
| genistin              | 2247                  | 1.3       | 2283                | 1.1       | 2299                | 1.2       | 2276  | 1.2       |
| biochanin A           | 3525                  | 1.9       | 3680                | 3.3       | 3603                | 1.1       | 3603  | 2.2       |
| sissostrin            | 8360                  | 1.2       | 8179                | 1.1       | 8278                | 0.9       | 8272  | 1.1       |
| sissostrin malonate   | 20537                 | 0.4       | 20618               | 0.2       | 20744               | 0.9       | 20633 | 0.5       |
| formononetin          | 2963                  | 2.7       | 2790                | 3.9       | 2989                | 4.6       | 2914  | 3.7       |
| ononin                | 4409                  | 2.3       | 4481                | 0.6       | 4337                | 1.9       | 4409  | 1.6       |
| ononin malonate       | 7317                  | 4.8       | 7012                | 3.4       | 7614                | 4.0       | 7314  | 4.1       |

Abbreviations:  $RSD$  – related standard deviation of the mean value (in %)
